# Supplementary material
Source: PubMed Central journal article supplement (PMC5803078)
Supplement: NIHMS929355-supplement-JBR-100601_SuppTable1_pdf.pdf [file NIHMS929355-supplement-JBR-100601_SuppTable1_pdf.pdf]

Supplemental Table 1: Selected Parameter Settings for xMSwrapper.apLCMS Function for QExactive

| Package     | Parameter        | Description                                                                  | Value(s)   |
|-------------|------------------|------------------------------------------------------------------------------|------------|
| apLCMS      | Min.run.list     | Minimum footprint of a feature in retention time (s)                         | c(4,3)     |
|             | Min.pres.list    | Minimum presence of signal over retention time window (p)                    | c(0.5,0.8) |
|             | Minexp.pct       | Minimum prevalence of feature across all spectra (p)                         | 0.1        |
| xMSanalyzer | Max.mz.diff      | m/z tolerance for feature matching (ppm)                                     | 10         |
|             | Max.rt.diff      | Retention time tolerance for feature matching (s)                            | 300        |
|             | Feat.filt.thresh | Threshold for filtering samples based on CoV (%)                             | 30         |
|             | Samp.filt.thresh | Threshold for filtering samples based on correlation between triplicates (p) | 0.1        |

(s) = seconds; (p) = proportion; ppm = parts per million; % = percent
